# Supplementary material for: Monocytes promote acute neuroinflammation and become pathological microglia in neonatal hypoxic-ischemic brain injury
Source: PubMed Central journal article supplement (PMC8692901; doi:10.7150/thno.64033), 2022-01-01
Supplement: thnov12p0512s1.pdf [file thnov12p0512s1.pdf]

Figure S1

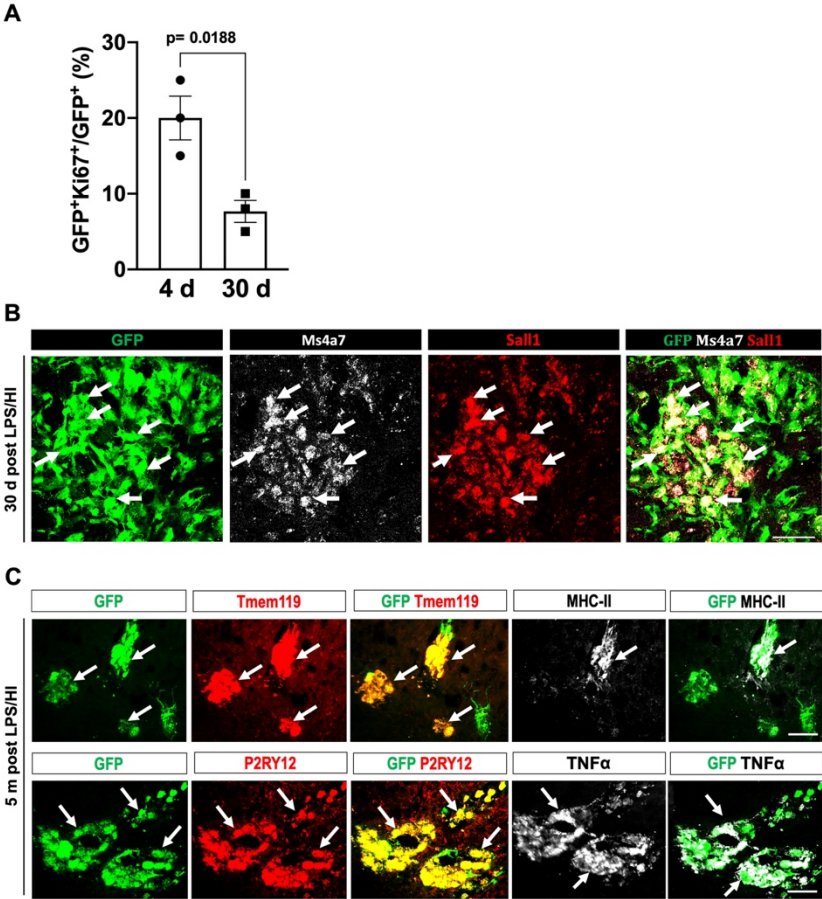

Figure S1

(A) Quantification of GFP+Ki67+ cells in the brains of CCR2-CreER; R26R-GFP mice at 4 d and 30 d after neonatal stroke (n = 3 of both genders). (B) Co-expression of Sall1 and Ms4a7 on CCR2+ monocyte derivatives at 30 d post-LPS/Hi. CCR2-CreER; R26R-GFP mice were subjected to tamoxifen injection at P8 and P9, followed by LPS/Hi injury at P10. Brains were harvested at 30 d after the injury. RNA scope images show that GFP+ monocyte derivatives express both Ms4a7 (white) and Sall1 (red) mRNA (arrows) (n = 5). Scale bar: 50 μm. (C) At 5 m post-LPS/Hi, clumps of GFP+ derivatives expressed MHC-II, TNFα, and the microglial markers (Tmem119 and P2RY12).

**Figure S2**

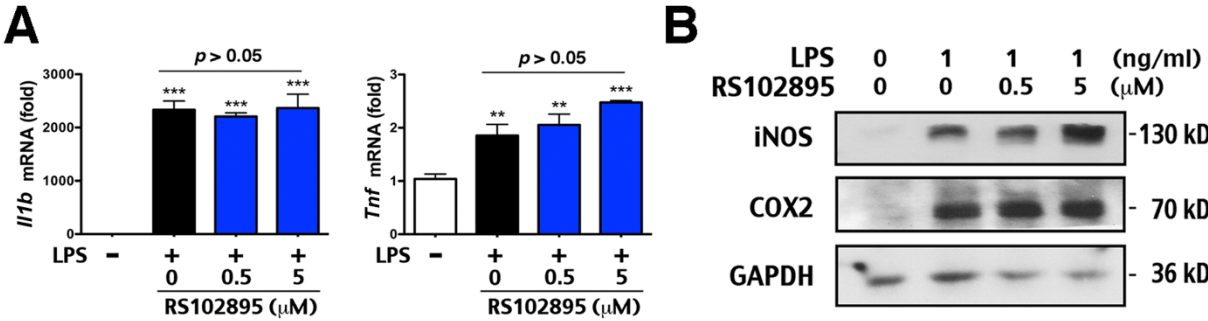

**Figure S2**

Incubation of immortalized microglia SM826 cells with 1 ng/ml LPS markedly elevated the *Il1b* and *Tnf* mRNAs (**A**) plus iNOS and COX2 protein (**B**) 24 h later. The addition of 0.5 or 5  $\mu$ M RS102895 failed to abate these responses, suggesting lack of direct inhibitory effects on microglia. N = 3 for each group.
